# Supplementary material
Source: PubMed Central journal article supplement (PMC8688252)
Supplement: NIHMS1750705-supplement-Unprocessed_blots_Extended_Data_Figure_2.pdf [file NIHMS1750705-supplement-Unprocessed_blots_Extended_Data_Figure_2.pdf]

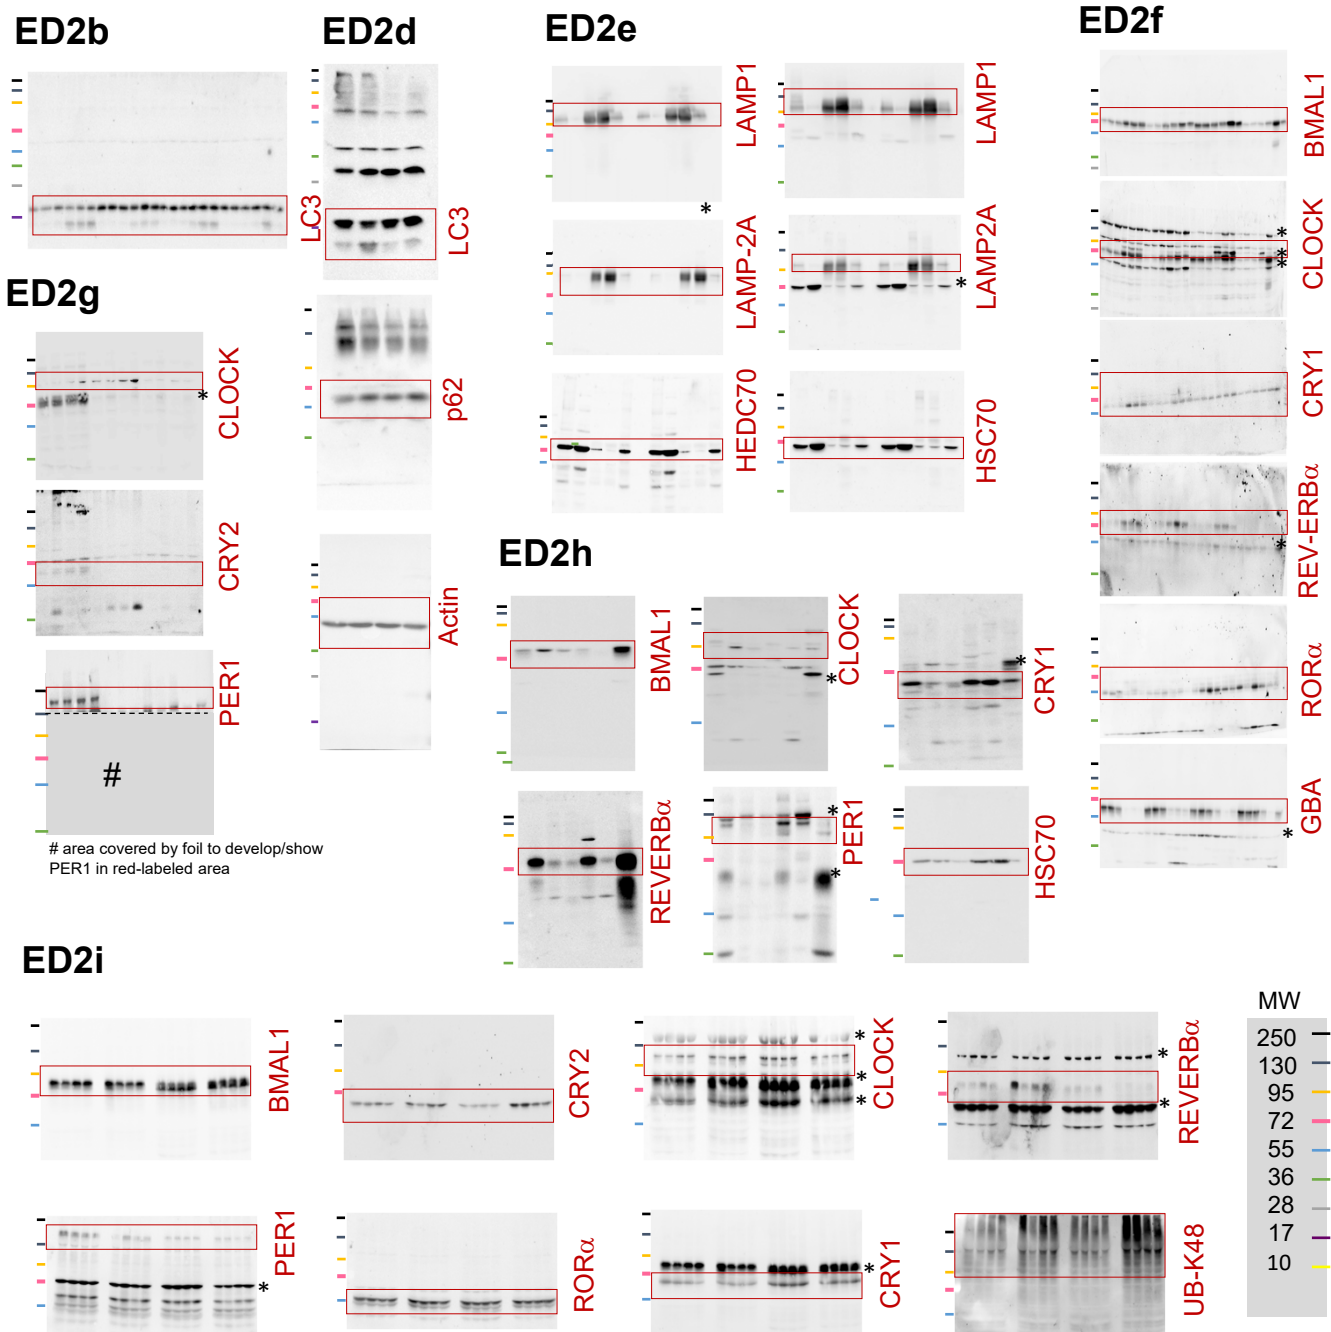

**Uncropped gels Extended Data Figure 2.** Red square indicates the section shown in the main figures. Molecular weight markers are shown on the left. \* indicates non-related band resulting from reblotting
