# Supplementary material
Source: PubMed Central journal article supplement (PMC8688252)
Supplement: NIHMS1750705-supplement-Unprocessed_blots_Extended_Data_Figure_5.pdf [file NIHMS1750705-supplement-Unprocessed_blots_Extended_Data_Figure_5.pdf]

**ED5a**

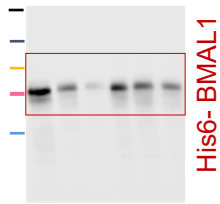

His6- BMAL1

**ED5i**

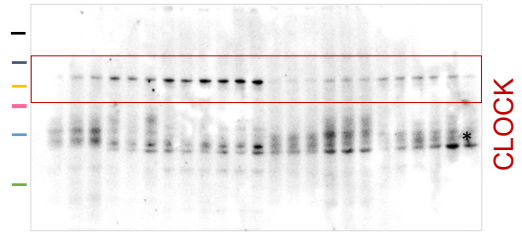

CLOCK

**ED5e**

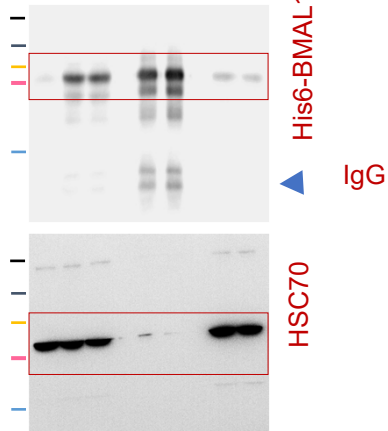

His6-BMAL1

IgG

HSC70

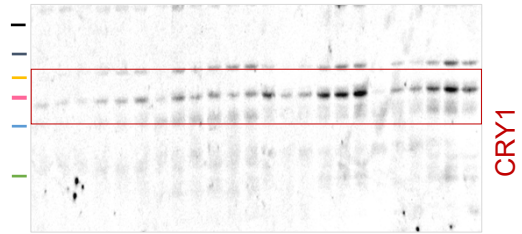

CRY1

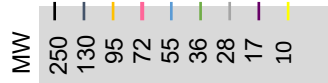

**Uncropped gels Extended Data Figure 5.** Red square indicates the section shown in the main figures. Molecular weight markers are shown on the left. \* indicates non-related band resulting from reblotting
