# Supplementary material
Source: PubMed Central journal article supplement (PMC8688252)
Supplement: NIHMS1750705-supplement-Unprocessed_blots_Fig__5.pdf [file NIHMS1750705-supplement-Unprocessed_blots_Fig__5.pdf]

5h

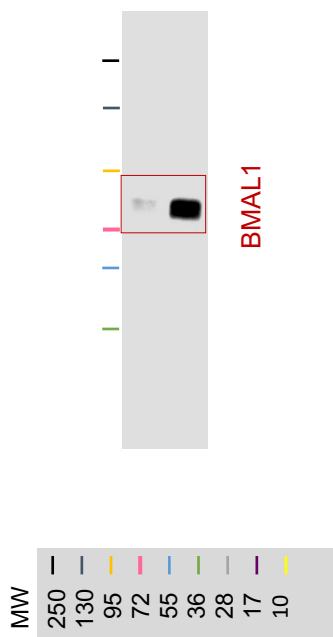

**Uncropped gels Main Figure 5.** Red square indicates the section shown in the main figures. Molecular weight markers are shown on the left. \* indicates non-related band resulting from reblotting
